# Supplementary material for: Global, regional and national ischemic heart disease burden attributable to household air pollution from solid fuels, 1990-2021，with projections to 2036: A systematic analysis for the global burden of disease study
Source: Research Square preprint supplement (doi:10.21203/rs.3.rs-7590842/v1), 2025-10-23
Supplement: Supplementary file 1 [file 656a8fac03178c0816d07d0f.docx]

|  | ASMR | | | ASDR | | |
| --- | --- | --- | --- | --- | --- | --- |
|  | Val | Lower | Upper | Val | Lower | Upper |
| 1990 | 147.411 | 147.411 | 147.411 | 3448.405 | 3448.403 | 3448.407 |
| 1991 | 146.621 | 146.621 | 146.621 | 3426.053 | 3426.052 | 3426.055 |
| 1992 | 146.723 | 146.723 | 146.723 | 3418.819 | 3418.818 | 3418.821 |
| 1993 | 146.441 | 146.441 | 146.441 | 3405.013 | 3405.012 | 3405.015 |
| 1994 | 146.190 | 146.190 | 146.190 | 3392.767 | 3392.765 | 3392.768 |
| 1995 | 146.490 | 146.490 | 146.490 | 3386.176 | 3386.174 | 3386.177 |
| 1996 | 145.467 | 145.467 | 145.467 | 3360.087 | 3360.085 | 3360.088 |
| 1997 | 144.093 | 144.093 | 144.093 | 3330.833 | 3330.831 | 3330.834 |
| 1998 | 143.066 | 143.066 | 143.066 | 3299.159 | 3299.158 | 3299.161 |
| 1999 | 140.604 | 140.604 | 140.604 | 3240.729 | 3240.727 | 3240.730 |
| 2000 | 140.039 | 140.039 | 140.039 | 3216.641 | 3216.640 | 3216.643 |
| 2001 | 139.065 | 139.065 | 139.065 | 3179.198 | 3179.197 | 3179.199 |
| 2002 | 137.878 | 137.878 | 137.878 | 3142.067 | 3142.066 | 3142.069 |
| 2003 | 137.378 | 137.378 | 137.378 | 3107.685 | 3107.684 | 3107.687 |
| 2004 | 134.372 | 134.372 | 134.372 | 3029.395 | 3029.394 | 3029.397 |
| 2005 | 130.647 | 130.647 | 130.647 | 2946.438 | 2946.437 | 2946.440 |
| 2006 | 125.424 | 125.424 | 125.424 | 2846.046 | 2846.045 | 2846.048 |
| 2007 | 121.719 | 121.719 | 121.719 | 2766.304 | 2766.303 | 2766.305 |
| 2008 | 118.374 | 118.374 | 118.374 | 2690.441 | 2690.44 | 2690.442 |
| 2009 | 113.980 | 113.980 | 113.980 | 2594.737 | 2594.736 | 2594.738 |
| 2010 | 110.741 | 110.741 | 110.741 | 2523.406 | 2523.405 | 2523.407 |
| 2011 | 106.564 | 106.564 | 106.564 | 2436.316 | 2436.315 | 2436.317 |
| 2012 | 100.650 | 100.650 | 100.650 | 2314.710 | 2314.709 | 2314.711 |
| 2013 | 94.444 | 94.444 | 94.444 | 2155.656 | 2155.655 | 2155.657 |
| 2014 | 88.399 | 88.399 | 88.399 | 2009.120 | 2009.119 | 2009.121 |
| 2015 | 81.695 | 81.695 | 81.695 | 1879.305 | 1879.304 | 1879.306 |
| 2016 | 77.573 | 77.573 | 77.573 | 1799.011 | 1799.011 | 1799.012 |
| 2017 | 73.004 | 73.004 | 73.004 | 1698.517 | 1698.516 | 1698.517 |
| 2018 | 70.133 | 70.133 | 70.133 | 1639.123 | 1639.122 | 1639.124 |
| 2019 | 67.581 | 67.581 | 67.581 | 1584.134 | 1584.133 | 1584.135 |
| 2020 | 65.625 | 65.625 | 65.625 | 1546.860 | 1546.859 | 1546.861 |
| 2021 | 66.810 | 66.810 | 66.810 | 1572.821 | 1572.820 | 1572.822 |
| 2022 | 65.525 | 65.522 | 65.528 | 1523.545 | 1523.482 | 1523.608 |
| 2023 | 65.254 | 65.25 | 65.258 | 1520.557 | 1520.456 | 1520.658 |
| 2024 | 65.005 | 64.999 | 65.011 | 1518.328 | 1518.178 | 1518.477 |
| 2025 | 64.790 | 64.7810 | 64.799 | 1516.984 | 1516.778 | 1517.189 |
| 2026 | 64.580 | 64.569 | 64.591 | 1515.793 | 1515.526 | 1516.060 |
| 2027 | 64.341 | 64.327 | 64.355 | 1514.126 | 1513.792 | 1514.460 |
| 2028 | 64.100 | 64.083 | 64.117 | 1512.661 | 1512.255 | 1513.067 |
| 2029 | 63.885 | 63.865 | 63.905 | 1511.949 | 1511.466 | 1512.432 |
| 2030 | 63.709 | 63.685 | 63.733 | 1512.057 | 1511.492 | 1512.621 |
| 2031 | 63.540 | 63.513 | 63.567 | 1512.344 | 1511.694 | 1512.994 |
| 2032 | 63.353 | 63.322 | 63.384 | 1512.244 | 1511.505 | 1512.983 |
| 2033 | 63.174 | 63.140 | 63.208 | 1512.461 | 1511.629 | 1513.294 |
| 2034 | 63.030 | 62.992 | 63.068 | 1513.472 | 1512.542 | 1514.402 |
| 2035 | 62.927 | 62.885 | 62.969 | 1515.280 | 1514.248 | 1516.311 |
| 2036 | 62.834 | 62.787 | 62.881 | 1517.309 | 1516.172 | 1518.446 |
