# Supplementary material for: Global, regional and national ischemic heart disease burden attributable to household air pollution from solid fuels, 1990-2021，with projections to 2036: A systematic analysis for the global burden of disease study
Source: Research Square preprint supplement (doi:10.21203/rs.3.rs-7590842/v1), 2025-10-23
Supplement: Supplementary file 2 [file c20a25dcbba8b206b6dc65f7.docx]

Table 1：The IHD burden of global for HAP in 1990 and 2021

|  | Deaths | | | | | | DALYs | | | | | |
| --- | --- | --- | --- | --- | --- | --- | --- | --- | --- | --- | --- | --- |
|  | 1990 | | | 2021 | | | 1990 | | | 2021 | | |
| location | Val（n） | upper | lower | Val（n） | upper | lower | Val（n） | upper | lower | Val（n） | upper | lower |
| Afghanistan | 8685.76015 | 11916.8681 | 6085.67285 | 8457.83528 | 11522.2785 | 5606.84535 | 245754.9502 | 348073.2668 | 168128.1169 | 219812.2903 | 303214.9831 | 141280.4929 |
| Albania | 334.840795 | 1122.70552 | 24.2366131 | 919.95996 | 1198.49077 | 619.775966 | 5486.292493 | 18818.02257 | 394.6108895 | 18786.90579 | 24580.29386 | 12710.7249 |
| Algeria | 22.4867639 | 125.839523 | 0.6820467 | 370.614074 | 1530.84962 | 30.8271499 | 451.2223612 | 2468.328782 | 13.63214934 | 8707.668678 | 35836.59515 | 726.1674046 |
| American Samoa | 0.96091437 | 5.32608139 | 0.01313367 | 0.32927478 | 3.23808022 | 0 | 24.49983637 | 137.4746026 | 0.323040669 | 9.377233941 | 92.28084547 | 0 |
| Andorra | 0.00060726 | 0.00092233 | 0 | 0.00183207 | 0.00613997 | 4.836E-13 | 0.010087658 | 0.014649774 | 0 | 0.037580753 | 0.123843433 | 9.7643E-12 |
| Angola | 1723.04034 | 3139.6111 | 588.817169 | 1432.27619 | 1935.51821 | 1023.4864 | 44131.21406 | 82585.43129 | 14717.6877 | 38526.87567 | 52533.23743 | 27454.33247 |
| Antigua and Barbuda | 0.04584283 | 0.3789367 | 6.9375E-05 | 0.50246003 | 2.91099775 | 0.01462898 | 0.90019115 | 7.322798125 | 0.001339782 | 9.206824929 | 52.80883321 | 0.267031056 |
| Argentina | 83.9024892 | 731.835762 | 0.52576076 | 1293.23705 | 4845.59253 | 114.019722 | 1520.943985 | 13269.57538 | 9.416416628 | 25543.59504 | 97146.71207 | 2190.74647 |
| Armenia | 110.752898 | 419.103735 | 11.5705729 | 777.434608 | 1333.80314 | 341.192303 | 1918.533977 | 7228.381663 | 197.8742534 | 15611.59719 | 27054.73703 | 6818.585577 |
| Australia | 1.3233945 | 7.70056725 | 8.1606E-08 | 31.2521952 | 349.917432 | 0.00485363 | 20.27692358 | 114.1161674 | 1.26391E-06 | 564.5382902 | 6331.228744 | 0.086431223 |
| Austria | 0.50252106 | 2.70863556 | 2.1928E-08 | 7.12364625 | 67.5046019 | 0.00283168 | 7.209011936 | 37.54458052 | 3.02639E-07 | 121.8646601 | 1164.889091 | 0.04784372 |
| Azerbaijan | 216.014819 | 1452.54506 | 3.10303511 | 2071.93725 | 4433.23136 | 392.907565 | 4418.94827 | 29705.61638 | 62.51141705 | 45554.95068 | 99186.74208 | 8496.89943 |
| Bahrain | 0.06270391 | 0.41246954 | 3.0777E-08 | 0.80202502 | 8.00727232 | 0.00024633 | 1.669808002 | 11.03637502 | 8.0025E-07 | 21.37133839 | 211.7979552 | 0.006524111 |
| Bangladesh | 48593.9889 | 65653.4689 | 32754.7528 | 21924.8279 | 27545.1265 | 16494.252 | 1177057.985 | 1589779.537 | 793681.3264 | 617262.1695 | 774694.945 | 466093.7873 |
| Barbados | 0.04809456 | 0.34803717 | 0.00095366 | 0.1718217 | 1.07118865 | 0.00384542 | 0.854117585 | 6.171274885 | 0.017023198 | 2.952906746 | 18.73950018 | 0.066239426 |
| Belarus | 50.2041676 | 428.686081 | 0.31040704 | 443.323107 | 1892.37408 | 36.1896172 | 861.6963202 | 7383.208458 | 5.177388651 | 8071.053021 | 34478.53244 | 647.0118096 |
| Belgium | 0.22700255 | 1.64653004 | 6.7057E-08 | 7.14761615 | 64.7994919 | 0.00324571 | 3.533930831 | 25.79277317 | 1.03848E-06 | 124.4865238 | 1124.343635 | 0.056766891 |
| Belize | 9.32661349 | 25.5991294 | 1.56692735 | 15.9362927 | 24.0411242 | 8.08617553 | 208.4974229 | 570.0277941 | 34.0463685 | 333.3655616 | 508.4680737 | 169.7497199 |
| Benin | 1197.41295 | 1567.9827 | 868.01437 | 480.506211 | 624.073108 | 352.343689 | 27589.6965 | 36788.72673 | 19535.70509 | 10631.08855 | 13870.84733 | 7777.273637 |
| Bermuda | 0.00966869 | 0.04799208 | 1.8378E-12 | 0.14977594 | 1.5109651 | 0 | 0.163064099 | 0.776226826 | 3.00286E-11 | 2.965990559 | 29.12318971 | 0 |
| Bhutan | 44.2520543 | 119.60698 | 8.24180611 | 84.1765282 | 114.318301 | 57.6395484 | 984.1059479 | 2665.105587 | 178.2442418 | 2422.80681 | 3326.559818 | 1663.544628 |
| Bolivia | 609.844127 | 1292.19476 | 176.057519 | 893.316054 | 1371.15485 | 462.019282 | 12932.80187 | 27728.70057 | 3667.242898 | 20790.31862 | 32490.77747 | 10548.535 |
| Bosnia and Herzegovina | 677.976425 | 2131.95813 | 57.6114641 | 2442.23884 | 3036.36496 | 1822.24658 | 11504.32765 | 36828.03794 | 985.5835058 | 54999.97534 | 68659.05735 | 41208.68698 |
| Botswana | 37.0946973 | 194.551064 | 0.74645341 | 126.453125 | 191.549516 | 62.6894613 | 894.6769157 | 4692.249986 | 17.3615485 | 3214.766537 | 4970.084791 | 1579.767937 |
| Brazil | 3244.97067 | 8729.58256 | 821.778978 | 11503.6965 | 19803.1025 | 5942.32819 | 74550.50846 | 197085.8083 | 18659.81135 | 278118.9519 | 479445.8201 | 143352.6461 |
| Brunei | 0.02466253 | 0.035331 | 2.65E-14 | 0.0560309 | 0.04007177 | 0 | 0.680613864 | 0.952843583 | 7.009E-13 | 1.473562461 | 1.026295063 | 0 |
| Bulgaria | 375.830103 | 3058.23691 | 2.62250243 | 1715.17019 | 5880.5104 | 155.700883 | 6566.544359 | 53998.42756 | 45.68034418 | 34136.34223 | 118488.5434 | 3056.356273 |
| Burkina Faso | 2749.50393 | 3801.3207 | 1852.22694 | 1142.14301 | 1521.39659 | 839.602598 | 61436.22552 | 85160.70159 | 40760.44369 | 26659.14718 | 35634.73489 | 19316.50223 |
| Burundi | 1436.84767 | 1906.08603 | 1013.19365 | 904.040304 | 1240.15552 | 636.508493 | 38715.78587 | 51508.11856 | 27016.33455 | 23199.73121 | 32318.18363 | 16041.41742 |
| C?te d'Ivoire | 3883.19461 | 5259.9823 | 2674.56833 | 1831.26093 | 2415.29662 | 1318.78171 | 94660.7457 | 130401.5568 | 64267.44681 | 49863.24731 | 66011.77986 | 36365.70409 |
| Cambodia | 3275.3176 | 4852.02118 | 2191.78012 | 959.811986 | 1405.98881 | 630.363804 | 79489.58009 | 120289.6249 | 51763.21848 | 22696.69606 | 33287.5114 | 14811.66915 |
| Cameroon | 0.49443991 | 2.98348721 | 7.2852E-08 | 14.77874 | 129.533313 | 0.00119754 | 7.934366096 | 47.65842184 | 1.15743E-06 | 266.5692766 | 2339.309472 | 0.021464382 |
| Canada | 46.8308907 | 100.017786 | 13.3083003 | 59.4678964 | 76.1604208 | 43.8639466 | 882.1353967 | 1898.143408 | 248.2220727 | 1154.256711 | 1473.42665 | 842.5685925 |
| Cape Verde | 1060.57261 | 1541.62736 | 695.123346 | 621.846475 | 900.258209 | 436.910548 | 30243.12934 | 44848.61992 | 19347.12377 | 17058.68034 | 25209.51109 | 11750.06226 |
| Central African Republic | 1794.18002 | 2493.0281 | 1271.20883 | 849.035275 | 1155.4782 | 619.610631 | 43857.31825 | 61098.48406 | 30648.07017 | 18935.10024 | 25861.62223 | 13690.63186 |
| Chad | 79.9906213 | 796.214235 | 0.14068625 | 1746.38241 | 2897.58899 | 658.85073 | 1571.222107 | 15687.13818 | 2.686192668 | 33562.88913 | 55916.29205 | 12490.83849 |
| Chile | 111231.386 | 363203.78 | 15914.4961 | 190054.382 | 245861.679 | 142302.378 | 2041536.89 | 6614120.687 | 290228.9707 | 4642542.434 | 6001378.159 | 3457037.67 |
| China | 709.89096 | 3596.5987 | 27.0768869 | 2853.658 | 5389.50916 | 845.079192 | 12952.10612 | 65867.84449 | 490.4121349 | 64934.10522 | 123476.8637 | 19085.517 |
| Colombia | 117.064826 | 159.409684 | 80.0578652 | 53.4778132 | 73.4336634 | 37.7108426 | 2818.185341 | 3849.171494 | 1890.386364 | 1407.747894 | 1936.980852 | 976.0356058 |
| Comoros | 739.573069 | 1177.89129 | 360.13995 | 585.069592 | 791.152944 | 393.488754 | 19022.46623 | 31044.86651 | 9110.12968 | 15135.00228 | 20907.55541 | 10079.71921 |
| Congo (Brazzaville) | 0.03994527 | 0.43174409 | 4.35E-14 | 0.37352297 | 2.08116928 | 0.00193365 | 0.842762797 | 8.954098084 | 9.717E-13 | 9.453714064 | 53.49820447 | 0.045749056 |
| Cook Islands | 26.8869263 | 172.765749 | 0.54095106 | 220.994079 | 441.657127 | 53.4666364 | 539.8337334 | 3476.123614 | 10.80722104 | 4384.943848 | 8804.557558 | 1046.991177 |
| Costa Rica | 3207.42329 | 4603.95091 | 2044.56121 | 1156.57538 | 1609.95786 | 751.263885 | 80498.16761 | 117430.0537 | 50204.26587 | 30193.53553 | 42510.37712 | 19296.78874 |
| Croatia | 38.1925506 | 385.140502 | 0.05298955 | 352.44184 | 1931.77612 | 8.6657283 | 559.2722101 | 5569.276844 | 0.771767931 | 6363.482349 | 34953.29452 | 154.0280639 |
| Cuba | 168.883468 | 624.456437 | 24.7324965 | 584.475028 | 1578.30339 | 115.187443 | 3003.662393 | 11072.78702 | 433.4955308 | 11239.29319 | 30099.05793 | 2202.429619 |
| Cyprus | 0.06768067 | 0.56510146 | 2.1562E-06 | 1.62698231 | 13.3860466 | 0.00818276 | 1.156276274 | 9.857997233 | 3.56181E-05 | 29.10050983 | 238.7413976 | 0.144042621 |
| Czech Republic | 9.92798394 | 92.1011084 | 0.0002533 | 91.1303747 | 836.05458 | 0.35163502 | 152.11024 | 1391.354227 | 0.003781434 | 1749.42462 | 15958.33493 | 6.744798962 |
| Denmark | 0.07177039 | 0.35846893 | 3.3543E-09 | 2.15287329 | 18.7541772 | 0.00028953 | 1.135628656 | 5.590387573 | 5.11426E-08 | 35.87595833 | 312.350593 | 0.004804396 |
| Djibouti | 58.1565384 | 103.260517 | 27.520834 | 18.1774462 | 28.5565104 | 10.3854941 | 1605.462763 | 2845.691746 | 755.0290175 | 521.7432754 | 840.4897572 | 294.2990867 |
| Dominica | 1.60982938 | 5.97775309 | 0.14318477 | 16.5871243 | 26.4371062 | 6.11879142 | 31.0334656 | 114.616353 | 2.763787734 | 306.1560552 | 492.1678731 | 114.37231 |
| Dominican Republic | 164.895671 | 940.453773 | 3.96502675 | 1065.82753 | 1561.73329 | 549.891634 | 3581.806842 | 20480.52625 | 85.11110206 | 24944.62968 | 36731.16111 | 12731.4836 |
| DR Congo | 12926.2145 | 17971.8936 | 8763.93105 | 6403.83509 | 9078.30595 | 4467.55219 | 329880.9389 | 454520.3491 | 222578.8258 | 164913.9788 | 236009.5684 | 114342.7136 |
| Ecuador | 183.391996 | 749.243815 | 14.1616219 | 536.972441 | 1062.22579 | 175.847602 | 3524.975703 | 14579.38232 | 267.5418045 | 11373.81045 | 22660.4191 | 3683.959894 |
| Egypt | 99.5733395 | 485.254662 | 6.11180123 | 7698.99428 | 14489.5193 | 3230.40255 | 2515.442231 | 12329.4316 | 154.0390971 | 198565.0781 | 375181.1502 | 82387.98615 |
| El Salvador | 412.607948 | 962.779845 | 94.9701947 | 1026.83523 | 1312.01825 | 732.251581 | 7677.721612 | 17983.80256 | 1715.515524 | 22416.88084 | 28619.52557 | 15888.74544 |
| Equatorial Guinea | 4.12721616 | 46.0579596 | 0.00143688 | 98.2205685 | 134.147915 | 67.5808365 | 99.93476993 | 1089.201356 | 0.033867744 | 2545.68998 | 3539.774041 | 1713.568845 |
| Eritrea | 693.140344 | 988.141908 | 481.520821 | 288.080365 | 407.419203 | 197.117362 | 19911.76322 | 28950.19051 | 13657.49338 | 8980.009608 | 12860.61978 | 6119.591357 |
| Estonia | 7.55110418 | 87.5632737 | 0.00080101 | 321.583045 | 1061.36013 | 26.1554783 | 108.672347 | 1245.134462 | 0.011388483 | 5742.631979 | 19298.13549 | 468.3193336 |
| Eswatini | 8067.0183 | 10538.3937 | 6048.53464 | 5860.25872 | 8057.79373 | 4330.3271 | 200543.0205 | 264302.4441 | 149376.0476 | 166697.7643 | 234109.0813 | 122120.3657 |
| Ethiopia | 31.8683864 | 48.6333299 | 19.1928025 | 39.0115624 | 53.2478591 | 27.4854302 | 929.9321215 | 1427.465887 | 552.5303217 | 1080.795227 | 1494.129342 | 758.0222356 |
| Federated States of Micronesia | 145.729352 | 365.053932 | 19.0067001 | 257.664931 | 369.68263 | 137.104761 | 3906.346097 | 9899.103641 | 499.6111831 | 7798.484426 | 11127.45579 | 4098.820201 |
| Fiji | 0.14448404 | 0.88839424 | 6.8509E-08 | 2.95030198 | 26.794089 | 0.00130025 | 2.065490806 | 12.44442997 | 9.43981E-07 | 54.60086294 | 495.2409199 | 0.023939908 |
| Finland | 1.60832957 | 12.1133997 | 1.7779E-06 | 29.2977733 | 262.023034 | 0.01180325 | 23.71551337 | 174.5017647 | 2.52669E-05 | 481.8419353 | 4344.314369 | 0.190912358 |
| France | 13.2084339 | 89.4389388 | 0.25358543 | 39.7031366 | 167.610112 | 1.39146207 | 306.2460605 | 2064.444827 | 5.936079829 | 885.8902511 | 3823.278064 | 30.76598092 |
| Gabon | 456.741306 | 1331.09947 | 46.8293878 | 2213.40752 | 5551.46482 | 279.690744 | 8461.081444 | 24645.21635 | 868.443548 | 43949.29876 | 112017.5003 | 5520.496928 |
| Georgia | 1.97463184 | 9.28098314 | 8.7479E-08 | 22.929061 | 214.450814 | 0.00601012 | 29.36004115 | 132.5998956 | 1.23818E-06 | 387.4357792 | 3558.337129 | 0.099101879 |
| Germany | 3449.5212 | 5263.62697 | 1855.14532 | 2526.37806 | 3377.46653 | 1808.86916 | 84264.37145 | 128987.3485 | 44712.17581 | 63731.75725 | 84869.02875 | 45082.0873 |
| Ghana | 5.50458716 | 57.7570965 | 0.00251938 | 74.1062601 | 537.715801 | 0.57188317 | 84.29426256 | 877.7872447 | 0.037387547 | 1357.623784 | 9801.681103 | 10.26846349 |
| Greece | 0.00051657 | 0.00036557 | 0 | 0.00352481 | 0.01693474 | 2.6171E-11 | 0.012463357 | 0.008606159 | 0 | 0.092164795 | 0.429461121 | 6.75041E-10 |
| Greenland | 0.36093086 | 2.069199 | 0.01329829 | 14.8863178 | 25.6402909 | 6.0272249 | 7.84041663 | 44.02409543 | 0.284693207 | 299.9327024 | 519.4414093 | 120.6035527 |
| Grenada | 0.16498262 | 1.01014612 | 1.35E-09 | 0.07460577 | 0.77207636 | 0 | 4.236341116 | 26.0224157 | 3.37609E-08 | 1.923680175 | 19.70796191 | 0 |
| Guam | 1786.61112 | 3030.02517 | 586.714613 | 1078.68429 | 1479.1572 | 691.606963 | 36000.91038 | 61575.96427 | 11804.07532 | 26399.62461 | 35991.2157 | 16868.26108 |
| Guatemala | 2008.25306 | 2812.30054 | 1410.17138 | 1020.99813 | 1384.16316 | 744.948325 | 45985.83561 | 64794.61249 | 31546.24067 | 22780.15228 | 31042.72016 | 16711.09713 |
| Guinea | 330.094948 | 442.714299 | 229.33487 | 185.696538 | 254.377192 | 124.801373 | 8882.367571 | 12096.98538 | 6086.427086 | 4801.217601 | 6701.070279 | 3172.836177 |
| Guinea-Bissau | 24.265354 | 63.1957782 | 4.69660949 | 122.057608 | 181.566878 | 72.5183076 | 581.4224069 | 1515.492891 | 111.1200174 | 3034.117378 | 4556.865885 | 1782.523039 |
| Guyana | 4981.08085 | 6966.13185 | 3439.04878 | 2893.34763 | 3750.90594 | 2117.39878 | 127410.1799 | 179860.0343 | 86868.58476 | 74395.20365 | 97761.74741 | 54030.72303 |
| Haiti | 2162.6243 | 3082.00812 | 1336.37679 | 638.546196 | 839.741179 | 475.483682 | 45896.15778 | 65229.41313 | 28313.20709 | 15079.895 | 19938.44351 | 11234.53807 |
| Honduras | 229.312355 | 2715.05671 | 0.07590597 | 1540.78723 | 7769.36848 | 47.2554698 | 3704.140465 | 43492.97312 | 1.201803089 | 31241.11248 | 159204.1719 | 947.9510988 |
| Hungary | 0.00326932 | 0.01276389 | 1.8366E-10 | 0.04135601 | 0.41803799 | 2.762E-06 | 0.049060287 | 0.189902294 | 2.68687E-09 | 0.704325981 | 7.019935485 | 4.65933E-05 |
| Iceland | 279066.825 | 451175.853 | 156661.762 | 199832.646 | 249398.522 | 153748.614 | 7012154.366 | 11360333.66 | 3951419.204 | 5756741.136 | 7160204.404 | 4436588.883 |
| India | 25814.0076 | 53730.1204 | 8012.16447 | 28048.6153 | 36305.2198 | 20779.7073 | 670697.2134 | 1404742.948 | 205212.1628 | 793739.6925 | 1020325.654 | 594723.8985 |
| Indonesia | 42.4239774 | 251.724337 | 1.89250766 | 1768.7725 | 3985.00672 | 594.846367 | 919.5288299 | 5445.193024 | 42.91998469 | 44169.07617 | 99394.49607 | 14891.69927 |
| Iran | 76.5444585 | 506.510869 | 1.25456581 | 761.506051 | 2654.15612 | 95.7975144 | 1777.373806 | 11611.76851 | 29.24957765 | 17888.9376 | 62978.4532 | 2224.414857 |
| Iraq | 0.06387408 | 0.12953324 | 4.5726E-12 | 9.37668614 | 70.1607146 | 0.08179922 | 1.051645986 | 2.115416786 | 7.41434E-11 | 175.0380828 | 1310.743612 | 1.508839375 |
| Ireland | 0.25136145 | 2.24567469 | 3.1461E-06 | 4.14782307 | 36.8563207 | 0.01565088 | 3.907907923 | 35.1904024 | 4.71666E-05 | 76.28170443 | 674.2182018 | 0.285763677 |
| Israel | 10.8937355 | 89.1803494 | 0.00804005 | 109.650438 | 823.289435 | 0.87552067 | 153.8699699 | 1264.835202 | 0.113051963 | 1986.280634 | 14929.46575 | 16.03510349 |
| Italy | 78.9965541 | 211.663643 | 14.6016702 | 299.264567 | 434.4266 | 141.908025 | 1469.267028 | 3979.411204 | 280.2169358 | 5489.397551 | 7941.044087 | 2576.797143 |
| Jamaica | 9.11576294 | 72.0155624 | 0.00057887 | 85.8941978 | 821.3804 | 0.27429876 | 130.2109355 | 1014.154895 | 0.008238414 | 1500.23204 | 14252.89535 | 4.699007542 |
| Japan | 1.08417631 | 4.46847218 | 0.10580144 | 8.56292461 | 24.3908454 | 1.91075455 | 26.76312404 | 109.3993053 | 2.590676911 | 221.483539 | 631.5227858 | 48.99258944 |
| Jordan | 118.202121 | 1225.63595 | 0.11223583 | 1971.90549 | 6517.31516 | 158.768447 | 2245.00682 | 23104.05079 | 2.139319481 | 41324.62754 | 138050.1999 | 3257.268742 |
| Kazakhstan | 3967.11578 | 5323.01211 | 2665.34763 | 1086.0732 | 1437.31028 | 729.856063 | 97603.98218 | 129866.131 | 65767.96535 | 26260.61303 | 34405.31314 | 17991.56318 |
| Kenya | 36.1165911 | 48.7815016 | 25.0128595 | 26.6403643 | 34.3042058 | 19.7552077 | 1111.732104 | 1504.639851 | 768.0293083 | 807.3660881 | 1040.760254 | 591.0657507 |
| Kiribati | 0.04243249 | 0.09133116 | 1.8998E-12 | 0.26919355 | 1.67968356 | 1.0534E-07 | 1.189588338 | 2.467949759 | 5.20555E-11 | 7.700860479 | 47.57819601 | 2.95081E-06 |
| Kuwait | 1838.0385 | 2660.10119 | 1051.45655 | 1596.29266 | 2248.61625 | 910.365683 | 36829.67417 | 54065.89537 | 20857.65001 | 33624.23082 | 48119.68427 | 19093.73347 |
| Kyrgyzstan | 2068.28606 | 3121.44135 | 993.739498 | 1722.94789 | 2331.81621 | 1242.67859 | 52355.86689 | 78779.21421 | 24853.55284 | 47931.3489 | 65527.98532 | 34160.38549 |
| Laos | 44.2594043 | 468.336483 | 0.03445918 | 628.335146 | 2381.9107 | 42.6480135 | 693.8998522 | 7400.160253 | 0.527880585 | 11621.12953 | 44545.18075 | 772.6522041 |
| Latvia | 4.91298277 | 32.3756271 | 0.13375815 | 85.5331204 | 265.174596 | 10.6842574 | 85.51836636 | 555.5904154 | 2.396692071 | 1998.824012 | 6262.347609 | 246.6772301 |
| Lebanon | 252.711847 | 409.197967 | 150.608618 | 131.111312 | 183.663002 | 93.7909018 | 6423.547612 | 10862.57784 | 3711.856924 | 2899.236775 | 4010.327022 | 2060.287818 |
| Lesotho | 753.398259 | 1034.14698 | 534.54272 | 414.267275 | 518.582331 | 313.53676 | 18596.41443 | 25774.99827 | 12891.3221 | 9374.222926 | 11947.35348 | 6996.314129 |
| Liberia | 7.73167118 | 50.3418699 | 0.23143683 | 6.12115708 | 54.8361316 | 0.00046494 | 192.1563139 | 1273.03534 | 5.721098151 | 144.7005633 | 1282.356005 | 0.010946002 |
| Libya | 14.8314373 | 147.805169 | 0.00226811 | 356.906987 | 1578.44493 | 20.5312642 | 217.6887611 | 2153.807549 | 0.032468787 | 6243.275191 | 27895.0427 | 354.1991374 |
| Lithuania | 0.005585 | 0.00169976 | 0 | 0.1110756 | 0.85785211 | 7.3388E-08 | 0.087724922 | 0.025704455 | 0 | 1.98784137 | 15.28831149 | 1.33811E-06 |
| Luxembourg | 3917.25956 | 5422.61821 | 2666.29908 | 1606.47119 | 2021.45204 | 1213.16849 | 113899.5633 | 157106.1493 | 77752.52224 | 43195.72253 | 54553.25582 | 32663.07949 |
| Madagascar | 2231.35315 | 2898.93333 | 1649.19022 | 933.012979 | 1177.53802 | 710.040892 | 60447.00461 | 78858.28028 | 44078.18705 | 24924.67224 | 31475.95065 | 18967.20921 |
| Malawi | 17.3339641 | 179.427265 | 0.00718929 | 281.927576 | 925.848046 | 37.7654278 | 402.9679962 | 4090.439237 | 0.16338196 | 6650.926546 | 21880.61184 | 881.5391645 |
| Malaysia | 2.76762931 | 18.3449029 | 0.04416592 | 38.9741306 | 53.4525587 | 23.3746571 | 62.48152456 | 422.9888318 | 0.969510065 | 1130.272009 | 1585.236407 | 677.5837097 |
| Maldives | 1834.35476 | 2591.42508 | 1241.15812 | 900.00564 | 1232.04383 | 609.967866 | 44635.71055 | 63089.17538 | 30286.22035 | 22201.02898 | 30703.73342 | 15155.52053 |
| Mali | 0.05790888 | 0.48960307 | 5.1588E-07 | 3.57321861 | 21.2611753 | 0.09346196 | 0.904278787 | 7.61365812 | 7.87441E-06 | 66.98690789 | 398.6922389 | 1.742046887 |
| Malta | 14.688132 | 22.8264977 | 8.95223194 | 8.41467379 | 11.7636116 | 5.51564541 | 458.6930773 | 714.7260138 | 276.9310096 | 240.5207189 | 335.8839878 | 157.5983294 |
| Marshall Islands | 461.743757 | 730.502957 | 263.620776 | 368.61652 | 517.206584 | 246.065537 | 9936.599895 | 15881.77386 | 5595.368396 | 8349.805971 | 11752.86068 | 5564.735526 |
| Mauritania | 1.4459562 | 13.3500283 | 0.00441864 | 46.992038 | 117.598254 | 8.53939524 | 30.65407317 | 283.3447705 | 0.093037087 | 1158.251287 | 2931.547646 | 208.1708838 |
| Mauritius | 2706.63946 | 10354.9103 | 226.648436 | 2135.29514 | 5927.25713 | 348.652288 | 51726.56604 | 200222.6282 | 4320.885287 | 44788.61489 | 125380.164 | 7207.627709 |
| Mexico | 983.513116 | 1817.37249 | 322.735952 | 3663.28784 | 4949.27662 | 2279.19963 | 18013.97318 | 33508.98237 | 5944.093992 | 71159.8261 | 96448.96195 | 44175.9395 |
| Moldova | 0.00059961 | 7.8E-14 | 0 | 0.00214802 | 2.0206E-08 | 0 | 0.009555441 | 1.1325E-12 | 0 | 0.035014417 | 3.22684E-07 | 0 |
| Monaco | 306.998562 | 968.756981 | 25.1064794 | 964.369088 | 1230.72478 | 684.262527 | 6782.538106 | 21763.56989 | 543.6330144 | 20528.20764 | 26416.25654 | 14672.88725 |
| Mongolia | 65.0804675 | 376.056497 | 0.92515179 | 80.5087754 | 273.308257 | 5.14106245 | 1143.217078 | 6584.921968 | 15.99174178 | 1659.584108 | 5743.190209 | 104.0596481 |
| Montenegro | 1086.99143 | 3508.80232 | 155.567465 | 5187.45303 | 7993.87644 | 2762.20256 | 23763.79967 | 75872.07995 | 3482.958586 | 122703.6033 | 191439.0366 | 66480.98701 |
| Morocco | 1827.50899 | 2443.65851 | 1239.94879 | 695.146016 | 885.110208 | 535.827866 | 49881.80797 | 67623.57347 | 33586.66607 | 17775.24062 | 22555.72249 | 13654.52061 |
| Mozambique | 16636.3202 | 24270.5749 | 8821.54505 | 15295.9498 | 20503.238 | 10877.4476 | 377813.4916 | 549977.5981 | 193224.3633 | 411310.8492 | 554722.4869 | 289557.0833 |
| Myanmar | 133.978792 | 370.625502 | 14.8516284 | 162.545987 | 234.714967 | 91.0320652 | 3210.884071 | 9038.745719 | 346.5342426 | 4063.089745 | 5883.992711 | 2247.620356 |
| Namibia | 0.19427613 | 0.86414179 | 0.00650157 | 0.17179364 | 1.4977423 | 0 | 5.934400864 | 27.0167469 | 0.201265346 | 5.467842307 | 47.28232222 | 0 |
| Nauru | 8714.21091 | 11733.8769 | 6031.30606 | 4037.88338 | 5512.39262 | 2902.99132 | 208855.1514 | 283082.2243 | 143578.5736 | 112912.3061 | 154070.676 | 80215.50178 |
| Nepal | 0.20238873 | 0.98592475 | 3.0985E-09 | 6.5040125 | 69.751501 | 0.00167581 | 3.102009206 | 14.68523497 | 4.75046E-08 | 119.2214037 | 1270.891282 | 0.030402835 |
| Netherlands | 0.28276034 | 2.17746948 | 4.1207E-06 | 3.63982195 | 35.0826361 | 0.00530208 | 4.915057019 | 37.81944 | 8.13736E-05 | 74.01014266 | 708.2679583 | 0.125299244 |
| New Zealand | 793.629394 | 1168.98837 | 478.563303 | 406.706612 | 509.898937 | 301.555542 | 16553.53056 | 24710.25566 | 9776.816576 | 9041.933946 | 11318.64477 | 6673.296957 |
| Nicaragua | 1731.72035 | 2572.59933 | 1108.4669 | 527.016642 | 779.132696 | 328.706969 | 41215.38075 | 61777.89149 | 26171.29406 | 13070.13159 | 19443.05431 | 8059.070518 |
| Niger | 18658.2461 | 27967.4988 | 10221.3658 | 12802.4725 | 18070.6926 | 8595.82516 | 426064.2879 | 648194.9266 | 232704.1094 | 284289.2427 | 408433.8874 | 186033.5554 |
| Nigeria | 0.04443534 | 0.23790563 | 0.00081364 | 0.71113811 | 1.29669414 | 0.17936144 | 0.954329581 | 5.24159644 | 0.017172784 | 14.42401306 | 27.18839829 | 3.449853278 |
| Niue | 14093.1677 | 18506.5232 | 10070.1863 | 5228.96355 | 7110.24359 | 3496.97459 | 314484.8408 | 418916.994 | 223746.3228 | 127888.2935 | 178416.0491 | 83744.15378 |
| North Korea | 150.931542 | 734.035117 | 5.85515567 | 457.46472 | 1033.59413 | 86.7263794 | 2846.962732 | 13979.9782 | 109.0519046 | 9998.294017 | 22782.31827 | 1882.467835 |
| North Macedonia | 0.14959874 | 1.57316651 | 1.1589E-05 | 0.02893027 | 0.20602208 | 0 | 4.014740176 | 41.58149994 | 0.000311444 | 0.966053582 | 6.802269561 | 0 |
| Northern Mariana Islands | 0.02237692 | 0.03657209 | 1.4463E-12 | 0.94276128 | 8.05287111 | 3.499E-05 | 0.337943399 | 0.536681442 | 2.03304E-11 | 16.40737886 | 140.6924207 | 0.000596084 |
| Norway | 0.25945341 | 1.6682353 | 4.3728E-07 | 13.8260625 | 129.604361 | 0.03289478 | 6.647304955 | 41.76432035 | 1.14612E-05 | 348.8337679 | 3267.963584 | 0.817179415 |
| Oman | 45985.3145 | 67107.7275 | 26767.4108 | 24789.7293 | 32162.544 | 17451.7785 | 1240956.762 | 1834067.118 | 718720.692 | 628017.405 | 812407.5199 | 446439.0323 |
| Pakistan | 0.00343852 | 0.02293809 | 3.3854E-05 | 0.00571451 | 0.02736331 | 1.7465E-05 | 0.091785748 | 0.614676866 | 0.00091641 | 0.151047305 | 0.725089398 | 0.000447996 |
| Palau | 55.500186 | 118.120802 | 21.5227429 | 193.362164 | 308.353141 | 106.14986 | 1249.836674 | 2681.786246 | 480.4510812 | 4164.417835 | 6733.495797 | 2262.651951 |
| Palestine | 13.0359222 | 121.235159 | 0.02775083 | 191.419496 | 352.765612 | 57.2072173 | 250.3982028 | 2332.457061 | 0.515931883 | 3796.106879 | 6994.621732 | 1124.94774 |
| Panama | 2435.48666 | 3445.78112 | 1631.18936 | 874.00637 | 1237.76992 | 587.169318 | 73437.22526 | 105494.0684 | 49164.84484 | 26839.55541 | 38226.29392 | 17567.6535 |
| Papua New Guinea | 382.629591 | 1098.03797 | 34.5533938 | 625.735582 | 876.295759 | 331.57802 | 8219.404975 | 23578.84989 | 740.8864527 | 13541.98003 | 18911.42531 | 7098.469468 |
| Paraguay | 539.635589 | 2235.04013 | 30.3835582 | 1690.49705 | 2762.17885 | 715.16243 | 10772.9987 | 45055.94056 | 603.981735 | 36601.12211 | 61076.79886 | 15099.95404 |
| Peru | 17544.2236 | 28772.8509 | 8548.76065 | 10894.6394 | 14158.2189 | 7777.39798 | 439892.7891 | 723175.8766 | 216317.915 | 288360.581 | 377663.9878 | 204834.6659 |
| Philippines | 546.095427 | 5127.60059 | 1.35636654 | 10327.394 | 25097.4868 | 2099.11045 | 8702.124291 | 82776.4353 | 20.65622822 | 211415.6459 | 523420.7246 | 42195.66385 |
| Poland | 1.97980618 | 18.3936508 | 0.00034083 | 116.069344 | 722.220761 | 2.45523922 | 31.42176192 | 299.918432 | 0.005309411 | 2139.228125 | 13446.44979 | 44.56203518 |
| Portugal | 0.06872481 | 0.47020207 | 3.4981E-07 | 0.47053787 | 4.1573068 | 8.0086E-07 | 1.184043284 | 8.012846958 | 6.01453E-06 | 9.001527686 | 79.48140165 | 1.51112E-05 |
| Puerto Rico | 0.00198332 | 3.9971E-05 | 0 | 0.00805197 | 0.01903307 | 2.871E-13 | 0.061846133 | 0.001204827 | 0 | 0.228709742 | 0.537509861 | 8.1625E-12 |
| Qatar | 455.29222 | 4563.11225 | 0.88366523 | 6481.27093 | 16312.6129 | 872.567118 | 7522.637622 | 76203.8524 | 14.40688595 | 126960.2045 | 324100.0407 | 16867.55132 |
| Romania | 740.998973 | 6234.16891 | 4.32785928 | 4180.28313 | 22619.3898 | 341.676073 | 13486.10763 | 113022.3378 | 79.75204475 | 82435.07868 | 452759.5851 | 6511.981573 |
| Russia | 1346.22545 | 1886.75804 | 859.627173 | 951.978133 | 1340.62226 | 643.139484 | 33473.33315 | 46669.59463 | 21479.32871 | 25732.90483 | 36249.52535 | 17519.72007 |
| Rwanda | 0.03324294 | 0.36578568 | 1.1109E-05 | 1.61696154 | 6.32965321 | 0.07511268 | 0.722971688 | 7.833030654 | 0.000236906 | 31.70112659 | 124.806755 | 1.48074397 |
| Saint Kitts and Nevis | 0.89975194 | 4.50937223 | 0.04535239 | 12.6908208 | 25.2059276 | 3.50168761 | 17.18359099 | 87.75794539 | 0.860187667 | 245.6324313 | 489.8794836 | 67.330596 |
| Saint Lucia | 1.1260003 | 5.17789038 | 0.07637881 | 15.1330311 | 25.1053223 | 6.57452498 | 21.36572567 | 98.48455352 | 1.457851749 | 302.0524623 | 502.5153621 | 129.7065544 |
| Saint Vincent and the Grenadines | 78.7123766 | 114.813818 | 43.0844124 | 54.8311534 | 70.649818 | 39.1403156 | 1963.41495 | 2925.725133 | 1055.835454 | 1377.466883 | 1784.773421 | 959.8374561 |
| Samoa | 0.00035717 | 0.00104923 | 2.679E-13 | 0.00217625 | 0.01309877 | 1.3345E-10 | 0.005488093 | 0.015662887 | 4.0695E-12 | 0.035403644 | 0.207452694 | 2.12535E-09 |
| San Marino | 22.9747129 | 31.9696153 | 16.1516361 | 18.5788817 | 23.0614529 | 14.0552067 | 530.1899836 | 741.9757893 | 366.9385579 | 393.1054461 | 490.0632166 | 295.0155881 |
| Sao Tome and Principe | 1.52230809 | 8.01098543 | 4.9148E-08 | 27.1759639 | 270.242346 | 0.00134354 | 50.70899076 | 266.1145985 | 1.60466E-06 | 712.8586472 | 7185.372088 | 0.035699544 |
| Saudi Arabia | 2827.3351 | 3909.81263 | 1956.5991 | 1125.42633 | 1509.68415 | 772.862401 | 63016.20734 | 87815.7505 | 43443.06067 | 26082.81906 | 35007.82226 | 17331.17788 |
| Senegal | 935.440915 | 4917.14575 | 24.125954 | 2886.88488 | 8059.44857 | 300.028529 | 15000.30246 | 78364.41457 | 381.2123196 | 55701.18136 | 156016.1203 | 5718.184254 |
| Serbia | 0.02196625 | 0.21703234 | 6.02E-06 | 0.66925711 | 3.38680472 | 0.02370763 | 0.489629401 | 4.818698613 | 0.00012964 | 14.62425329 | 75.10248922 | 0.510135145 |
| Seychelles | 1610.79709 | 2165.99771 | 1148.7828 | 902.722562 | 1172.17325 | 690.632785 | 37970.45154 | 51867.65236 | 25882.13958 | 20016.08794 | 26506.5093 | 14909.94416 |
| Sierra Leone | 0.17883481 | 0.10019196 | 0 | 13.1320869 | 136.249539 | 0.01728799 | 3.635643339 | 1.94259326 | 0 | 311.5190744 | 3207.70927 | 0.40904771 |
| Singapore | 5.83689351 | 57.2245812 | 0.00064761 | 73.8845894 | 470.713649 | 1.71015194 | 94.02658222 | 913.7597746 | 0.010338151 | 1427.232024 | 9113.053859 | 31.96232704 |
| Slovakia | 4.92420035 | 52.7346381 | 0.00024994 | 46.3860416 | 395.367605 | 0.25984223 | 75.62065384 | 788.0032299 | 0.003765693 | 869.9824014 | 7503.62272 | 4.789783229 |
| Slovenia | 331.535278 | 447.45716 | 234.452044 | 140.556582 | 189.541844 | 92.4268618 | 9558.66043 | 13165.01496 | 6664.894672 | 4080.344219 | 5637.898087 | 2486.503647 |
| Solomon Islands | 1429.85377 | 2144.15602 | 910.295693 | 554.533564 | 841.579793 | 370.697276 | 42560.03714 | 65541.57793 | 26413.4074 | 16584.68056 | 25472.8584 | 10889.37346 |
| Somalia | 1118.89312 | 2786.80682 | 224.859277 | 1457.85537 | 2682.02444 | 633.698298 | 25307.85156 | 64289.97512 | 5017.803942 | 37300.2554 | 69474.49583 | 16169.84595 |
| South Africa | 1.05983335 | 10.3218382 | 5.6935E-06 | 112.643737 | 480.530305 | 10.6559022 | 17.10546587 | 164.2680136 | 8.62788E-05 | 2557.584891 | 10835.77464 | 232.8325496 |
| South Korea | 1020.48001 | 1500.23823 | 669.71105 | 536.635819 | 814.132109 | 296.460508 | 27664.2434 | 40988.45504 | 17932.1514 | 13355.3307 | 20677.57633 | 7240.201533 |
| South Sudan | 6.80999417 | 59.8716536 | 8.8473E-05 | 254.474543 | 2071.23269 | 1.98902498 | 105.3696294 | 894.1982506 | 0.001324739 | 4525.524454 | 36408.32408 | 34.62294591 |
| Spain | 2759.67586 | 8043.0242 | 256.838309 | 4594.03923 | 5714.41003 | 3432.67743 | 59918.8306 | 177468.9958 | 5417.884841 | 112663.9172 | 140787.0893 | 83101.43077 |
| Sri Lanka | 8531.03428 | 13341.8245 | 4203.82674 | 9878.49501 | 13369.9096 | 7045.65895 | 214433.6035 | 337550.7563 | 105422.9835 | 255317.5805 | 347082.0824 | 179510.4442 |
| Sudan | 6.76992389 | 39.6446021 | 0.17806785 | 37.5522726 | 94.3053098 | 5.85768327 | 155.533085 | 911.647279 | 4.116945193 | 862.3846866 | 2175.388926 | 132.864446 |
| Suriname | 79.8304571 | 179.88273 | 14.2478563 | 66.5151835 | 94.7549924 | 39.7470599 | 2146.613938 | 4995.036561 | 375.6576511 | 1677.260718 | 2431.517815 | 1002.639768 |
| Sweden | 0.12274696 | 0.8836546 | 8.5716E-08 | 3.85810274 | 33.9820849 | 0.00200033 | 1.76757884 | 12.24023573 | 1.22241E-06 | 62.0815511 | 547.6223559 | 0.032039037 |
| Switzerland | 0.06044443 | 0.13810808 | 6.1325E-12 | 0.50291341 | 3.93797296 | 5.9675E-07 | 0.831757848 | 1.805621216 | 8.27145E-11 | 8.211036751 | 63.15509729 | 9.58822E-06 |
| Syria | 40.6977495 | 99.5668459 | 13.1239375 | 703.754497 | 1331.05685 | 298.855697 | 933.7022073 | 2305.156249 | 300.6662787 | 17369.47216 | 33103.51215 | 7419.310454 |
| Taiwan (province of China) | 16.3703991 | 116.406364 | 2.1671E-06 | 453.156242 | 2211.1713 | 12.9122177 | 311.2107024 | 2189.382391 | 4.01198E-05 | 9812.544236 | 48354.79237 | 281.9192288 |
| Tajikistan | 2266.74994 | 3142.73675 | 1465.63636 | 2240.59861 | 3025.2631 | 1454.2866 | 50155.82642 | 70754.78722 | 32461.19603 | 47409.55117 | 64552.32561 | 30258.57629 |
| Tanzania | 8488.8708 | 11580.1069 | 5925.71592 | 2666.80606 | 3501.1137 | 1924.57456 | 212346.7995 | 290971.6173 | 147849.9755 | 68353.41539 | 89909.88874 | 49631.47872 |
| Thailand | 905.089147 | 5141.49492 | 15.2724991 | 5964.5502 | 8884.04719 | 2995.64741 | 18747.42284 | 105584.1042 | 319.8540395 | 142039.5789 | 215229.0449 | 71549.56913 |
| The Bahamas | 0.12224092 | 1.17781479 | 1.1189E-05 | 0.28098898 | 3.26397127 | 4.4099E-05 | 2.820380611 | 27.17591051 | 0.000254271 | 6.831758609 | 79.37819287 | 0.001047704 |
| The Gambia | 418.101525 | 566.020617 | 283.526389 | 113.858259 | 157.080671 | 77.8785344 | 9576.930959 | 12990.93496 | 6392.446295 | 2749.300652 | 3852.739021 | 1836.410915 |
| Timor-Leste | 331.452119 | 514.341779 | 140.552962 | 111.505333 | 150.495515 | 81.4595081 | 7644.874994 | 12069.99638 | 3267.994978 | 3150.517526 | 4335.647004 | 2242.618627 |
| Togo | 1263.82415 | 1773.84533 | 848.416028 | 416.288197 | 553.214944 | 307.25678 | 31960.72797 | 45014.10732 | 21080.828 | 10158.05362 | 13642.81265 | 7438.493979 |
| Tokelau | 0.00061216 | 0.00251684 | 4.3154E-06 | 0.00705056 | 0.02139096 | 0.00038719 | 0.012965639 | 0.05289241 | 8.8148E-05 | 0.15945582 | 0.488725812 | 0.008655777 |
| Tonga | 19.9116733 | 30.9999533 | 9.33372975 | 23.3035448 | 30.6488286 | 16.5521156 | 453.6372911 | 721.3736589 | 210.6507134 | 595.4193368 | 783.5422353 | 422.4254304 |
| Trinidad and Tobago | 0.08662554 | 0.73285 | 1.4656E-06 | 3.0843684 | 15.8562513 | 0.12082583 | 1.844315441 | 15.25671654 | 3.10518E-05 | 68.54103369 | 352.7179752 | 2.658399964 |
| Tunisia | 14.2012001 | 70.0842863 | 0.95328443 | 595.776598 | 1153.28736 | 209.203376 | 281.1910767 | 1381.475903 | 18.90299363 | 13501.1434 | 25887.26877 | 4705.216918 |
| Turkey | 124.853353 | 1093.99568 | 0.12675979 | 3295.95048 | 10103.8778 | 350.692729 | 2368.740157 | 20647.43228 | 2.414029818 | 77037.49544 | 237453.331 | 8061.886703 |
| Turkmenistan | 1.93171006 | 15.8809041 | 0.00797214 | 19.8587708 | 71.0629983 | 2.97439861 | 40.73284443 | 338.3009842 | 0.166599009 | 430.8172656 | 1549.490234 | 63.58379709 |
| Tuvalu | 1.75773339 | 2.88095236 | 0.89585763 | 4.69648715 | 6.46168985 | 3.38230085 | 45.71663036 | 75.69486625 | 23.1028322 | 131.0333758 | 179.7280487 | 93.88698074 |
| Uganda | 3425.12688 | 4653.44816 | 2400.69675 | 1578.24825 | 2083.20895 | 1111.08215 | 87539.5036 | 118576.0233 | 59877.90284 | 39084.52587 | 51718.38181 | 27007.39638 |
| UK | 0.83875355 | 8.10982321 | 0.00016323 | 21.8957838 | 180.965057 | 0.16794638 | 13.78616139 | 131.4955167 | 0.002665222 | 400.2913471 | 3241.601405 | 3.104427332 |
| Ukraine | 4055.7953 | 14307.812 | 438.899913 | 5412.10608 | 21566.3534 | 470.340191 | 67488.69557 | 237069.1154 | 7432.244888 | 97906.47137 | 395985.2986 | 8438.279896 |
| United Arab Emirates | 0.00725284 | 0.01424898 | 0 | 0.0261241 | 0.00194418 | 0 | 0.22646822 | 0.434465498 | 0 | 0.768446443 | 0.056476961 | 0 |
| Uruguay | 7.08534368 | 41.7543903 | 9.7181E-07 | 43.5433104 | 374.694188 | 0.00467886 | 127.3637573 | 744.7792055 | 1.7652E-05 | 787.5572164 | 6642.202308 | 0.084768353 |
| USA | 6.70896202 | 60.1707831 | 0.01888076 | 185.569174 | 565.37912 | 21.3097301 | 112.8334749 | 1040.19184 | 0.315460347 | 3468.631138 | 10672.17596 | 398.539933 |
| Uzbekistan | 3417.60652 | 9002.72563 | 621.919752 | 5890.45222 | 8793.86475 | 3269.18415 | 72947.74367 | 193761.3135 | 13119.5184 | 119824.1074 | 181656.322 | 65445.71659 |
| Vanuatu | 180.801469 | 232.127513 | 132.97269 | 70.4343862 | 92.2957653 | 51.0865844 | 5317.451346 | 6902.156114 | 3869.583616 | 2116.921454 | 2821.152156 | 1499.262254 |
| Venezuela | 85.7739148 | 488.11509 | 3.30194885 | 65.7441576 | 344.180154 | 2.9790908 | 1823.424075 | 10479.56061 | 69.94776699 | 1521.06497 | 7944.713002 | 69.25221578 |
| Vietnam | 11303.4738 | 18424.3562 | 4731.4813 | 9949.21442 | 13608.5944 | 7306.30405 | 239793.6097 | 394152.0268 | 98255.20536 | 218579.3434 | 299107.3208 | 160885.8179 |
| Virgin Islands | 0.0115511 | 0.05491223 | 2.7172E-10 | 0.10557503 | 0.96473476 | 7.2341E-05 | 0.213695024 | 1.012992892 | 4.94016E-09 | 2.37561052 | 21.87011354 | 0.001574918 |
| Yemen | 5620.34012 | 8931.46834 | 3334.22709 | 4104.18192 | 5819.09806 | 2786.78759 | 142532.9419 | 229760.2551 | 82062.96111 | 110709.8114 | 157138.8308 | 73016.42336 |
| Zambia | 1825.7643 | 2539.31298 | 1194.43726 | 560.142243 | 736.778998 | 395.951087 | 47846.14383 | 66956.444 | 31067.39856 | 14512.55169 | 19290.59035 | 10318.34999 |
| Zimbabwe | 2195.93952 | 3035.7039 | 1571.78819 | 904.686398 | 1169.95899 | 675.930723 | 56469.09922 | 81078.62677 | 40089.48281 | 20252.35178 | 26175.00084 | 14967.07864 |
